# Supplementary material for: Template-free and morphology-controlled hydrothermal growth of single-crystalline Bi12TiO20 with excellent simulated sunlight photocatalytic activity
Source: Royal Society of Chemistry journal article supplement (doi:10.1039/c3ra22592e), 2013-01-01

## Electronic Supplementary Information

### Template-free and morphology-controlled hydrothermal growth of single-crystalline $\text{Bi}_{12}\text{TiO}_{20}$ with excellent simulated sunlight photocatalytic activity

Wan Guo<sup>a</sup>, Shengqu Zhang<sup>a,b</sup>, Yingna Guo<sup>a</sup>, Ling Ma<sup>a</sup>, Fang Su<sup>a</sup>, Yihang Guo<sup>a,\*</sup>,  
Aifang Geng<sup>c,\*</sup>

<sup>a</sup> *School of Chemistry, Northeast Normal University, Changchun 130024, PR China*

<sup>b</sup> *Analytical and Testing Center, Beihua University, Jilin 132013, PR China*

<sup>c</sup> *School of Chemistry and Environmental Engineering, Changchun University of Science and Technology, Changchun 130022, PR China*

---

Corresponding author.

Tel. or fax: +86 431 85098705. *E-mail address:* [guoyh@nenu.edu.cn](mailto:guoyh@nenu.edu.cn) (Y. Guo)

**Fig. S1** XRD patterns of bulk  $\text{Bi}_{12}\text{TiO}_{20}$  prepared by the solid state reaction method (SSR) with different molar ratios of Bi/Ti in the starting reactants: (a)  $n_{\text{Bi:Ti}}=4:1$ ; (b)  $n_{\text{Bi:Ti}}=8:1$ ; (c)  $n_{\text{Bi:Ti}}=12:1$ .

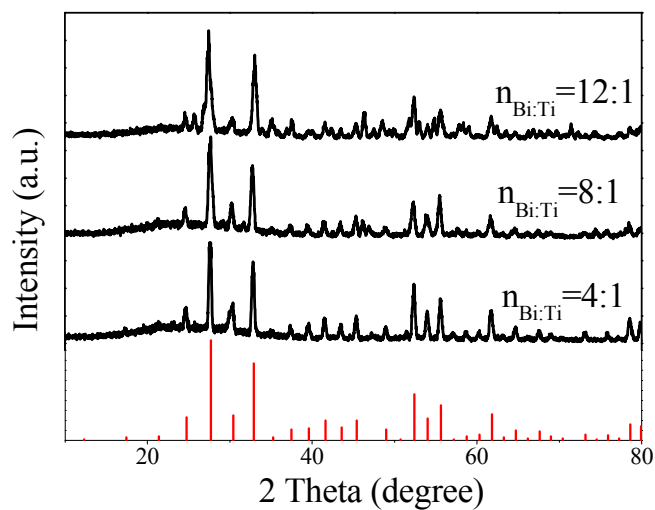

**Fig. S2** The plots of  $(ah\nu)^{1/2}$  vs.  $h\nu$  for the band gap energies, corresponding to the  $\text{Bi}_{12}\text{TiO}_{20}$  materials in different morphological structures: (a) the nanoflower; (b) the nanobelt; (c) the microtetrahedron.

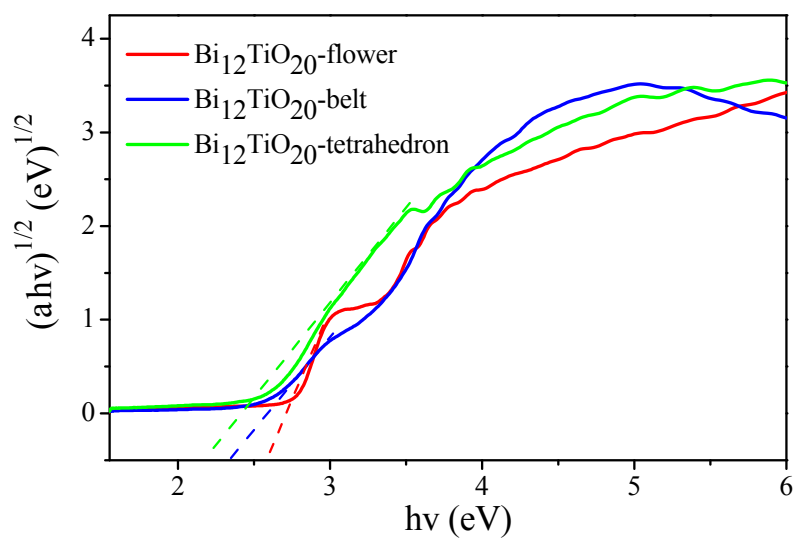

**Fig. S3** XRD patterns of the  $\text{Bi}_{12}\text{TiO}_{20}$  microcrystals prepared by a hydrothermal approach at 180 °C for 24 h with different concentrations of  $\text{NO}_3^-$  in the starting solution: (a) 0 mol  $\text{L}^{-1}$ ; (b) 0.5 mol  $\text{L}^{-1}$ ; (c) 1.5 mol  $\text{L}^{-1}$ .

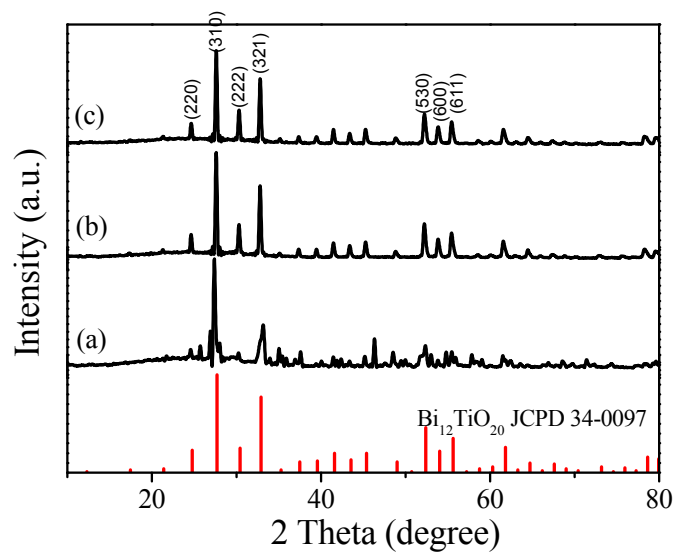

**Fig. S4** SEM images of the  $\text{Bi}_{12}\text{TiO}_{20}$  microcrystals prepared by a hydrothermal approach at different concentrations of  $\text{NO}_3^-$  in the starting solution: (a)  $0.5 \text{ mol L}^{-1}$ , (b)  $1.5 \text{ mol L}^{-1}$ , (c) EtOH +  $0.5 \text{ mol L}^{-1}$ , (d) EtOH +  $1.5 \text{ mol L}^{-1}$ .

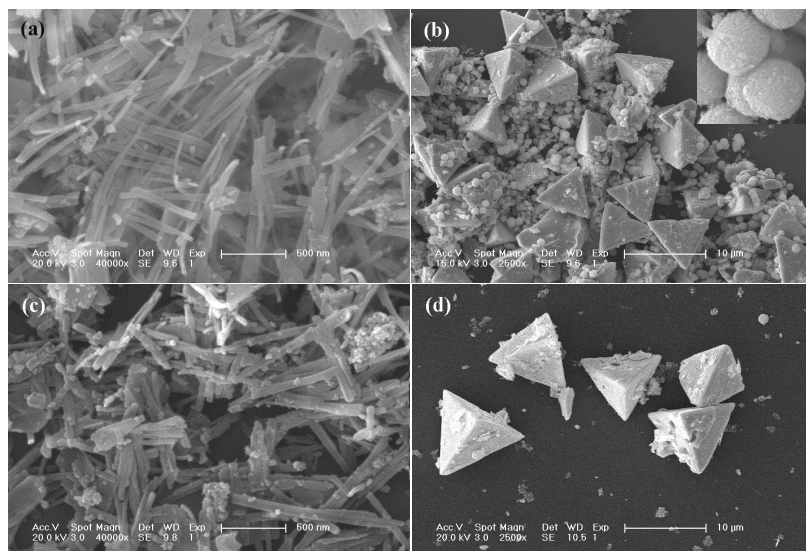

Supplement: c3ra22592e.pdf [file c3ra22592e.pdf]
